# Supplementary material for: Safe Handover : Safe Patients – The Electronic Handover System
Source: PubMed Central journal article supplement — BMJ Qual Improv Rep. 2014 Feb 26;2(2):u202926.w1359. doi: 10.1136/bmjquality.u202926.w1359 (PMC4663839; doi:10.1136/bmjquality.u202926.w1359), 2014-02-26
Supplement: bmjqir-2-u202926-w1359-s1.pdf [file bmjqir-2-u202926-w1359-s1.pdf]

| <b>TABLE 1: Handover Assessment</b>                                |                                                                                         |
|--------------------------------------------------------------------|-----------------------------------------------------------------------------------------|
| <b>Audit Criteria</b>                                              | <b>Percentage of Handovers containing the relevant information at: Baseline (n=105)</b> |
| A day the task was to be completed                                 | 73%                                                                                     |
| A list of current problems / differential diagnoses                | 47%                                                                                     |
| The patient's relevant past medical history                        | 9%                                                                                      |
| The actual task to be completed                                    | 95%                                                                                     |
| An indication for the task to be completed                         | 63%                                                                                     |
| The plan/action to be taken as a result of the task once completed | 43%                                                                                     |
| Whether junior doctors felt the handover was subjectively clear    | 51%                                                                                     |

*Table 1: Audit results of handovers on the original electronic handover system. This illustrates the percentage of handovers that contained the information relevant to the corresponding pre-entered handover subheadings.*
