# Supplementary material for: Safe Handover : Safe Patients – The Electronic Handover System
Source: PubMed Central journal article supplement — BMJ Qual Improv Rep. 2014 Feb 26;2(2):u202926.w1359. doi: 10.1136/bmjquality.u202926.w1359 (PMC4663839; doi:10.1136/bmjquality.u202926.w1359), 2014-02-26
Supplement: bmjqir-2-u202926-w1359-s2.pdf [file bmjqir-2-u202926-w1359-s2.pdf]

| <b>TABLE 2: Handover Reassessment</b>                              |                                                                        |                                                           |                                                           |
|--------------------------------------------------------------------|------------------------------------------------------------------------|-----------------------------------------------------------|-----------------------------------------------------------|
| <b>Audit Criteria</b>                                              | <b>Percentage of Handovers containing the relevant information at:</b> |                                                           |                                                           |
|                                                                    | <b>Baseline<br/>(n=105)</b>                                            | <b>Immediate<br/>Post-<br/>Implementation<br/>(n=108)</b> | <b>Long Term<br/>Post-<br/>Implementation<br/>(n=160)</b> |
| A day the task was to be completed                                 | 73%                                                                    | 87%                                                       | 99%                                                       |
| A list of current problems / differential diagnoses                | 47%                                                                    | 94%                                                       | 96%                                                       |
| The patient's relevant past medical history                        | 9%                                                                     | 64%                                                       | 81%                                                       |
| The actual task to be completed                                    | 95%                                                                    | 99%                                                       | 99%                                                       |
| An indication for the task to be completed                         | 63%                                                                    | 94%                                                       | 95%                                                       |
| The plan/action to be taken as a result of the task once completed | 43%                                                                    | 74%                                                       | 84%                                                       |
| Whether junior doctors felt the handover was subjectively clear    | 51%                                                                    | 91%                                                       | 91%                                                       |

*Table 2: Audit results of handovers on the original electronic handover system versus the immediate and long term results post-implementation of our revised system. This illustrates the percentage of handovers that contained the information relevant to the corresponding pre-entered handover subheadings.*
